# Supplementary material
Source: PubMed Central journal article supplement (PMC7964757)
Supplement: 3052_materials.pdf [file 3052_materials.pdf]

**On-line Table: Clinical, EEG, and imaging findings**

| No. | Age (yr)/<br>Sex | Epilepsy<br>Syndrome | Structural<br>MRI     | Semiology                                                                                       | Phase I (Ictal<br>Video Telemetry,<br>Surface EEG) | Phase II (Invasive<br>EEG/PET/SPECT)                                                                                                                                                                       | Op/Pathology                              | Outcome<br>Engel<br>Class |
|-----|------------------|----------------------|-----------------------|-------------------------------------------------------------------------------------------------|----------------------------------------------------|------------------------------------------------------------------------------------------------------------------------------------------------------------------------------------------------------------|-------------------------------------------|---------------------------|
| 1   | 49/M             | MTLE R               | HS R                  | Vocalizations, head turning to R, bimanual automatisms                                          |                                                    | Surface + foramen ovale electrodes: seizure onsets R mesiotemporal                                                                                                                                         | sAHE R 03/07                              | I                         |
| 2   | 31/F             | MTLE R               | HS R                  | Head version to L, figure 4 sign with L tonic posturing                                         | EEG consistent with R mesiotemporal seizure onsets |                                                                                                                                                                                                            | sAHE R 01/09                              | I                         |
| 3   | 53/F             | MTLE R               | HS R                  | Epigastric aura, vocalizations, oromandibular automatisms, head turning to R, postictal cuffing | EEG consistent with R mesiotemporal seizure onsets |                                                                                                                                                                                                            | sAHE R 04/08                              | I                         |
| 4   | 48/M             | MTLE R               | HS R                  | Epigastric aura, oromandibular automatisms, SG                                                  | EEG consistent with R mesiotemporal seizure onsets |                                                                                                                                                                                                            |                                           |                           |
| 5   | 30/M             | MTLE R               | Hippocampal atrophy R | Epigastric aura, head turning to L, tonic posturing L, R manual automatism, SG                  |                                                    | Surface + foramen ovale electrodes: seizure onsets R mesiotemporal<br>PET: hypometabolism temporomesial and temporopolar R, mesiotemporal L and insular region L<br>Ictal SPECT: L temporal hyperperfusion | sAHE R 08/07                              | I                         |
| 6   | 31/F             | MTLE L               | HS L                  | Epigastric aura, head turning to R, bimanual and perioral automatisms                           |                                                    | Surface + foramen ovale electrodes: seizure onsets L mesiotemporal                                                                                                                                         | Scheduled                                 |                           |
| 7   | 68/F             | MTLE R               | HS R                  | Nausea, oromandibular automatisms                                                               | EEG consistent with R mesiotemporal seizure onsets |                                                                                                                                                                                                            | sAHE R 03/08                              | II                        |
| 8   | 25/F             | MTLE R               | N                     | From sleep, screaming, head turning to L, bimanual automatisms, verbalizations, SG              |                                                    | EEG with strip and depth electrodes: seizure onset in the R amygdale                                                                                                                                       | Amygdalectomy and resection tmp R 9/09    | IV                        |
| 9   | 54/F             | MTLE R               | HS R                  | Strange feeling, oromandibular automatisms and bilateral arm automatisms                        |                                                    | Surface + foramen ovale electrodes: seizure onset R mesiotemporal                                                                                                                                          | sAHE R 12/09                              | I                         |
| 10  | 36/F             | MTLE R               | HS R                  | Behavioral arrest, manual automatisms R, dystonic posturing L arm                               | EEG consistent with R mesiotemporal seizure onset  |                                                                                                                                                                                                            | Scheduled                                 |                           |
| 11  | 27/M             | LTLE L               | N                     | Arrest reaction, speech arrest, tonic posturing, oral automatisms, SG                           |                                                    | EEG with strip and depth electrodes: L temporolateralpolar seizure onset                                                                                                                                   | Lesionectomy tmp L/DCM, 11/08             | I                         |
| 12  | 48/F             | FLE R                | DCM R frontal         | Elevation of both arms, head turning to R, arrest reaction, dystonic posturing L hand           |                                                    | EEG with strip and depth electrodes: R frontal seizure onset in the vicinity of the lesion                                                                                                                 | Lesionectomy frontal R/DCM 08/09          | I                         |
| 13  | 27/M             | PLE L                | DCM L parietal        | Aura with nervousness, tonic-clonic R arm                                                       |                                                    | EEG with grid electrodes: L parietal seizure onset in the vicinity of the lesion                                                                                                                           |                                           |                           |
| 14  | 56/F             | LTLE R               | N                     | Behavioral arrest, head version to the R                                                        |                                                    | EEG with strip and depth electrodes: R temporolateral seizure onset                                                                                                                                        | Scheduled                                 |                           |
| 15  | 20/F             | LTLE L               | HS L                  | Behavioral arrest, head turning to the L, yawing, manual automatisms L                          |                                                    | EEG with strip and depth electrodes: temporopolar to temporolaterobasal L                                                                                                                                  | Anterior temporal lobectomy 1/2010/DCM/HS | I                         |
| 16  | 38/F             | LTLE L               | DCM L T               | Behavioral arrest, blinking, head turning to the R, SG                                          |                                                    | EEG with strip and depth electrodes: seizure onset temporo-posterior basal L                                                                                                                               | Lesionectomy temporal L 8/2010            | I                         |

**Note:**—R indicates right; L, left; Op, operation; DCM, malformation of cortical development; N, normal; tmp, temporopolar; HS, hippocampal sclerosis; sAHE, selective amygdalo-hippocampectomy; PLE, parietal lobe epilepsy; FLE, frontal lobe epilepsy; SG, secondarily generalized seizure.

## On-Line Appendix

This supplemental material is based on the procedures published by Jann et al.<sup>1</sup>

### EEG Setup and Recording

Ninety-two MR imaging-compatible silver chloride EEG electrodes fixed on an elastic cap were placed on the patient's scalp according to the international 10–10 system. Electrodes were connected to 3 BrainAmp MR imaging-compatible amplifiers (Brain Products, Gilching, Germany). EEG was recorded at a sampling rate of 5 kHz and bandpass-filtered (0.1–250 Hz) (input range, 16.3 mV; recording reference, Fz). Two consecutive EEG sets were recorded, the first outside (10 minutes) and the second inside the MR imaging scanner during simultaneous fMRI acquisition (16 minutes). During the scans, patients were positioned in a regular 4-channel head coil with special foam that minimized head motion and discomfort due to electrodes and ear plugs.

### MR Imaging Setup and Data Acquisition

MR imaging was performed with a 3T Magnetom Trio TIM system (Siemens). High-resolution T1-weighted datasets were recorded for anatomic coregistration (magnetization-prepared rapid acquisition of gradient echo: 176 sagittal sections, isovoxel resolution = 1.0 mm, FOV = 256 mm × 256 mm, matrix size = 256 × 256, TR/TE = 1950/2.6 ms). fMRI was performed with a multisection single-shot T2\*-weighted echo-planar imaging sequence (32 sections, section thickness = 3 mm, gap thickness = 0.75 mm, flip angle = 90°, FOV = 192 × 192 mm, matrix size = 64 × 64, TR/TE = 4130/30 ms) for patients 1–5 and 11. Since June 2008, an optimized continuous fMRI protocol was used with the optimized sequence parameters: TR/TE = 1980/30 ms, matrix = size 64 × 64 mm, FOV = 92 × 192 mm, flip angle = 90° with a total of 460 volumes (patients 6–10 and 12–16).

### MR Imaging Preprocessing

Analysis of the MR imaging data was performed by using BrainVoyagerQX 1.10.2. (Brain Innovation, Maastricht, the Netherlands). Preprocessing included the section-scan correction, removal of low-frequency drifts, 3D motion detection and correction, and spatial smoothing with a Gaussian kernel of 6-mm FWHM. Coregistration of the 2D functional to the 3D structural images was performed by using the section po-

sition parameters of the T2\*-weighted measurements and the T1-weighted anatomic measurements of the scanner.

### EEG Preprocessing

EEGs recorded during the MR imaging sessions were postprocessed by using Vision Analyzer software (Version 1.05, Brain Products). Scan pulse artifacts correction was performed with average artifacts subtraction,<sup>2–4</sup> followed by bandpass-filtering (1–30 Hz) to remove the remaining high-frequency artifacts and down-sampling to 500 Hz.

### ICA-Based EEG Predictor for fMRI Data

The EEGs recorded outside and inside the MR imaging scanner were concatenated and decomposed into ICs, applying an extended infomax independent component analysis algorithm.<sup>5</sup> The resulting ICs were visually inspected by 2 experienced electroencephalographers/neurophysiologists (R.W., M.H.), taking into account their temporal dynamics (ie, epileptiform activity in the ICs was identified at the corresponding time points and scalp distributions, as IEDs, in the original EEG and their specific scalp map [weighting of IC-factor onto the single electrodes]).<sup>6</sup> The most representative IC was then selected by consent and convolved with a standard double- $\gamma$  hemodynamic response function (hemodynamic response function =  $\gamma_1 / \max(\gamma_1) - \text{dip} \times \gamma_2 / \max(\gamma_2)$ , scaled so that its total integral is zero (positive peak/FWHM, 5.4/5.2 seconds; negative peak/FWHM, 10.8/7.35 seconds; coefficient of the negative dip, 0.35). The representative IC factor was used as a predictor for the fMRI BOLD signal in the correlation estimation.

### References

1. Jann K, Wiest R, Hauf M, et al. **BOLD correlates of continuously fluctuating epileptic activity isolated by independent component analysis.** *Neuroimage* 2008;42:635–48
2. Allen PJ, Josephs O, Turner R. **A method for removing imaging artifact from continuous EEG recorded during functional MR imaging.** *Neuroimage* 2000;12:230–39
3. Allen PJ, Polizzi G, Krakow K, et al. **Identification of EEG events in the MR scanner: the problem of pulse artifact and a method for its subtraction.** *Neuroimage* 1998;8:229–39
4. Lemieux L, Allen PJ, Franconi F, et al. **Recording of EEG during fMRI experiments: patient safety.** *Magn Reson Med* 1997;38:943–52
5. Delorme A, Makeig S. **EEGLAB: an open source toolbox for analysis of single-trial EEG dynamics including independent component analysis.** *J Neurosci Methods* 2004;134:9–21
6. Hesse C, James C. **Tracking epileptiform activity in the multichannel ictal EEG by using spatially constrained independent component analysis.** *Conf Proc IEEE Eng Med Biol Soc* 2005;2:2067–70
